# Supplementary material for: Mouse embryonic stem cells can differentiate via multiple paths to the same state
Source: eLife. 2017 Oct 9;6:e26945. doi: 10.7554/eLife.26945 (PMC5648529; doi:10.7554/eLife.26945)
Supplement: Figure 2—source data 1. — Table indicates the expected expression level of key marker genes for each cell state. Hi = high expression, Lo = low expression, ‘-’=no expression. If an expression level is not specified for a given state-gene pair, then that gene was not a component of the criteria used to annotate state. Real expression values are shown in Figure 2D, and Figure 2—figure supplement 1. [file elife-26945-fig2-data1.xlsx]

## Sheet: DP cell state criteria
	ESC	NP	EMN	LMN	CN	DSCN	Gl1	Gl2	Mus	Meso	Endo
Pou5f1	Hi
Nanog	Hi
Esrrb	Hi
Sox1		Hi						Hi
Pax6		Hi						Hi
Sox3		Hi
Lin28a		Hi
Mnx1			Hi	-
Isl1			Hi	-
Isl2			Hi	-
Tubb3			Lo	Hi	Hi	Hi
Map2			Lo	Hi	Hi	Hi
Nefl			Hi	Hi
Nefm			Hi	Hi
Robo3				Hi
Hoxb3				Hi
Gbx2				Hi
Hoxd3				Hi
Sox14					Hi
Gad1					Hi
Emx2					Hi
Tal2					Hi
Neurog2						Hi
Ascl1						Hi
Dll1						Hi
Hes6						Hi
Fabp7							Hi	Hi
Vim							Lo	Hi
Rspo3							Hi
Rspo2							Hi
Rspo1							Hi
Wnt8b							Hi
Tagln									Hi
Acta2									Hi
Actc1									Hi
Col1a2										Hi
Col3a1										Hi
Foxc2										Hi
Sox17											Hi
Gata4											Hi
Gata6											Hi
