# Supplementary material for: Mouse embryonic stem cells can differentiate via multiple paths to the same state
Source: eLife. 2017 Oct 9;6:e26945. doi: 10.7554/eLife.26945 (PMC5648529; doi:10.7554/eLife.26945)
Supplement: Figure 2—source data 2. — Table indicates the expected expression level of key marker genes for each cell state. Hi = high expression, Lo = low expression, ‘-’=no expression. If an expression level is not specified for a given state-gene pair, then that gene was not a component of the criteria used to annotate state. Real expression values are shown in Figure 2E, and Figure 2—figure supplement 2. [file elife-26945-fig2-data2.xlsx]

## Sheet: SP cell state criteria
	ESC	NP	PNP	PVNP	MNP	EMN	LMN	Oligo	Astro	Mus	Stro
Pou5f1	Hi
Nanog	Hi
Esrrb	Hi
Sox1		Hi
Lin28a		Hi
Foxa2		Hi
Hoxb8			Hi	Hi	Hi	Lo	Lo
Hoxb3			Hi	Hi	Hi	Lo	Lo
Hoxd4			Hi	Hi	Hi	Lo	Lo
Sox3			Hi
Foxb1			Hi
Sox21			Hi
Neurog2				Hi
Neurod4				Hi
Olig2				Hi
Nhlh1				Hi
Tubb3					Lo	Hi	Hi
Map2					Lo	Lo	Hi
Mnx1				Lo	Hi	Lo	-
Isl1				Lo	Hi	Lo	-
Lhx3				Lo	Hi	Lo	-
Nefl						Hi	Lo
Nefm						Hi	Lo
Slit2						Hi
Mapt							Hi
Onecut2						Lo	Hi
Celf4							Hi
Gabbr1							Hi
Sox10								Hi
Olig1								Hi
Cnp								Hi
Omg								Hi
Gfap									Hi
Fabp7									Hi
Vim									Hi
Mylk										Hi
Foxf1										Hi
Myl9										Hi
Foxc1											Hi
Tbx18											Hi
Col1a2											Hi
