# Supplementary material for: Mouse embryonic stem cells can differentiate via multiple paths to the same state
Source: eLife journal article supplement (doi:10.7554/elife.26945), 2017-10-09
Supplement: supp [file elife-26945-supp-v1.zip]

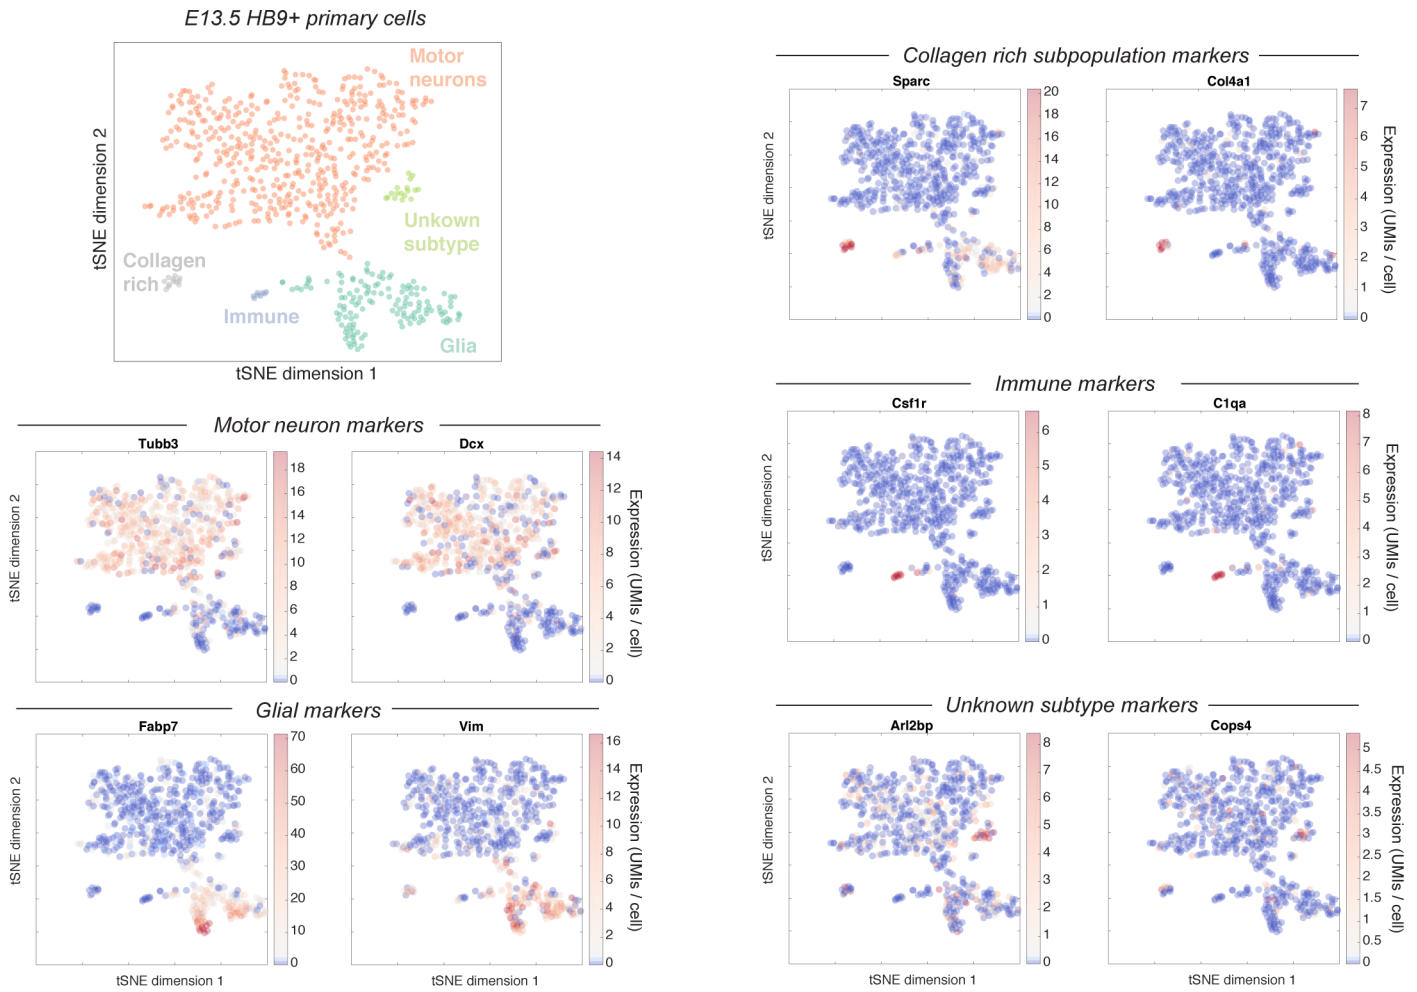

**Figure 5-figure supplement 1. Heterogeneity within the HB9+ E13.5 primary motor neuron population.** This figure shows the raw expression of a set of marker genes that were used to identify the subpopulations indicated in Fig. 2e. Two markers are shown per subpopulation, with their expression intensity overlaid on the original tSNE embedding.
