# Supplementary material for: Mouse embryonic stem cells can differentiate via multiple paths to the same state
Source: eLife journal article supplement (doi:10.7554/elife.26945), 2017-10-09
Supplement: supp [file elife-26945-supp-v1.zip]

**a** — SPRING visualization of joint DP and SP differentiation paths using only original Figure 2 cells —

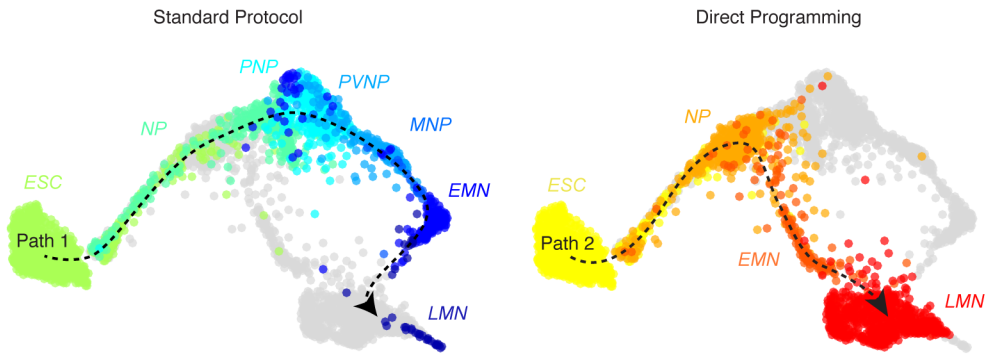

**b** — Joint SPRING visualization including additional EMN / LMN cells from SP replicate —

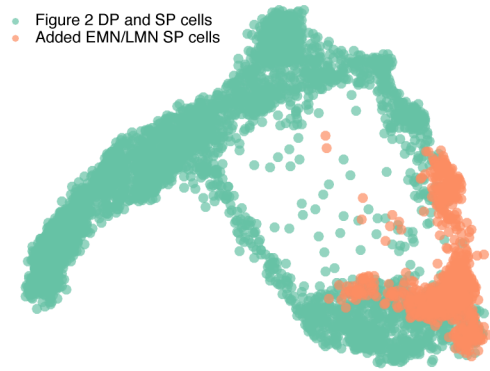

**Figure 3-figure supplement 1. Consolidation of DP vs SP end-state comparisons with additional SP EMN and LMN cells does not distort joint topology.** In our initial InDrops map of the SP, we found a low yield of the most mature EMN and LMN states in the SP (Figure 2C). To ensure that low representation of the SP end states did not interfere with our ability to make statistically rigorous comparisons between methods, we integrated additional EMN and LMN cells from a replicate SP experiment into our analyses. This figure serves as a control that shows that the topology of our joint SPRING visualization comparing DP and SP does not change from the case where we compare only cells from the original experiment (a), to when we compare the DP and SP using added EMN and LMN cells from the replicate SP experiment (b). As expected, the added cells specifically improve representation of terminal SP populations.
