# Supplementary material for: Mouse embryonic stem cells can differentiate via multiple paths to the same state
Source: eLife journal article supplement (doi:10.7554/elife.26945), 2017-10-09
Supplement: supp [file elife-26945-supp-v1.zip]

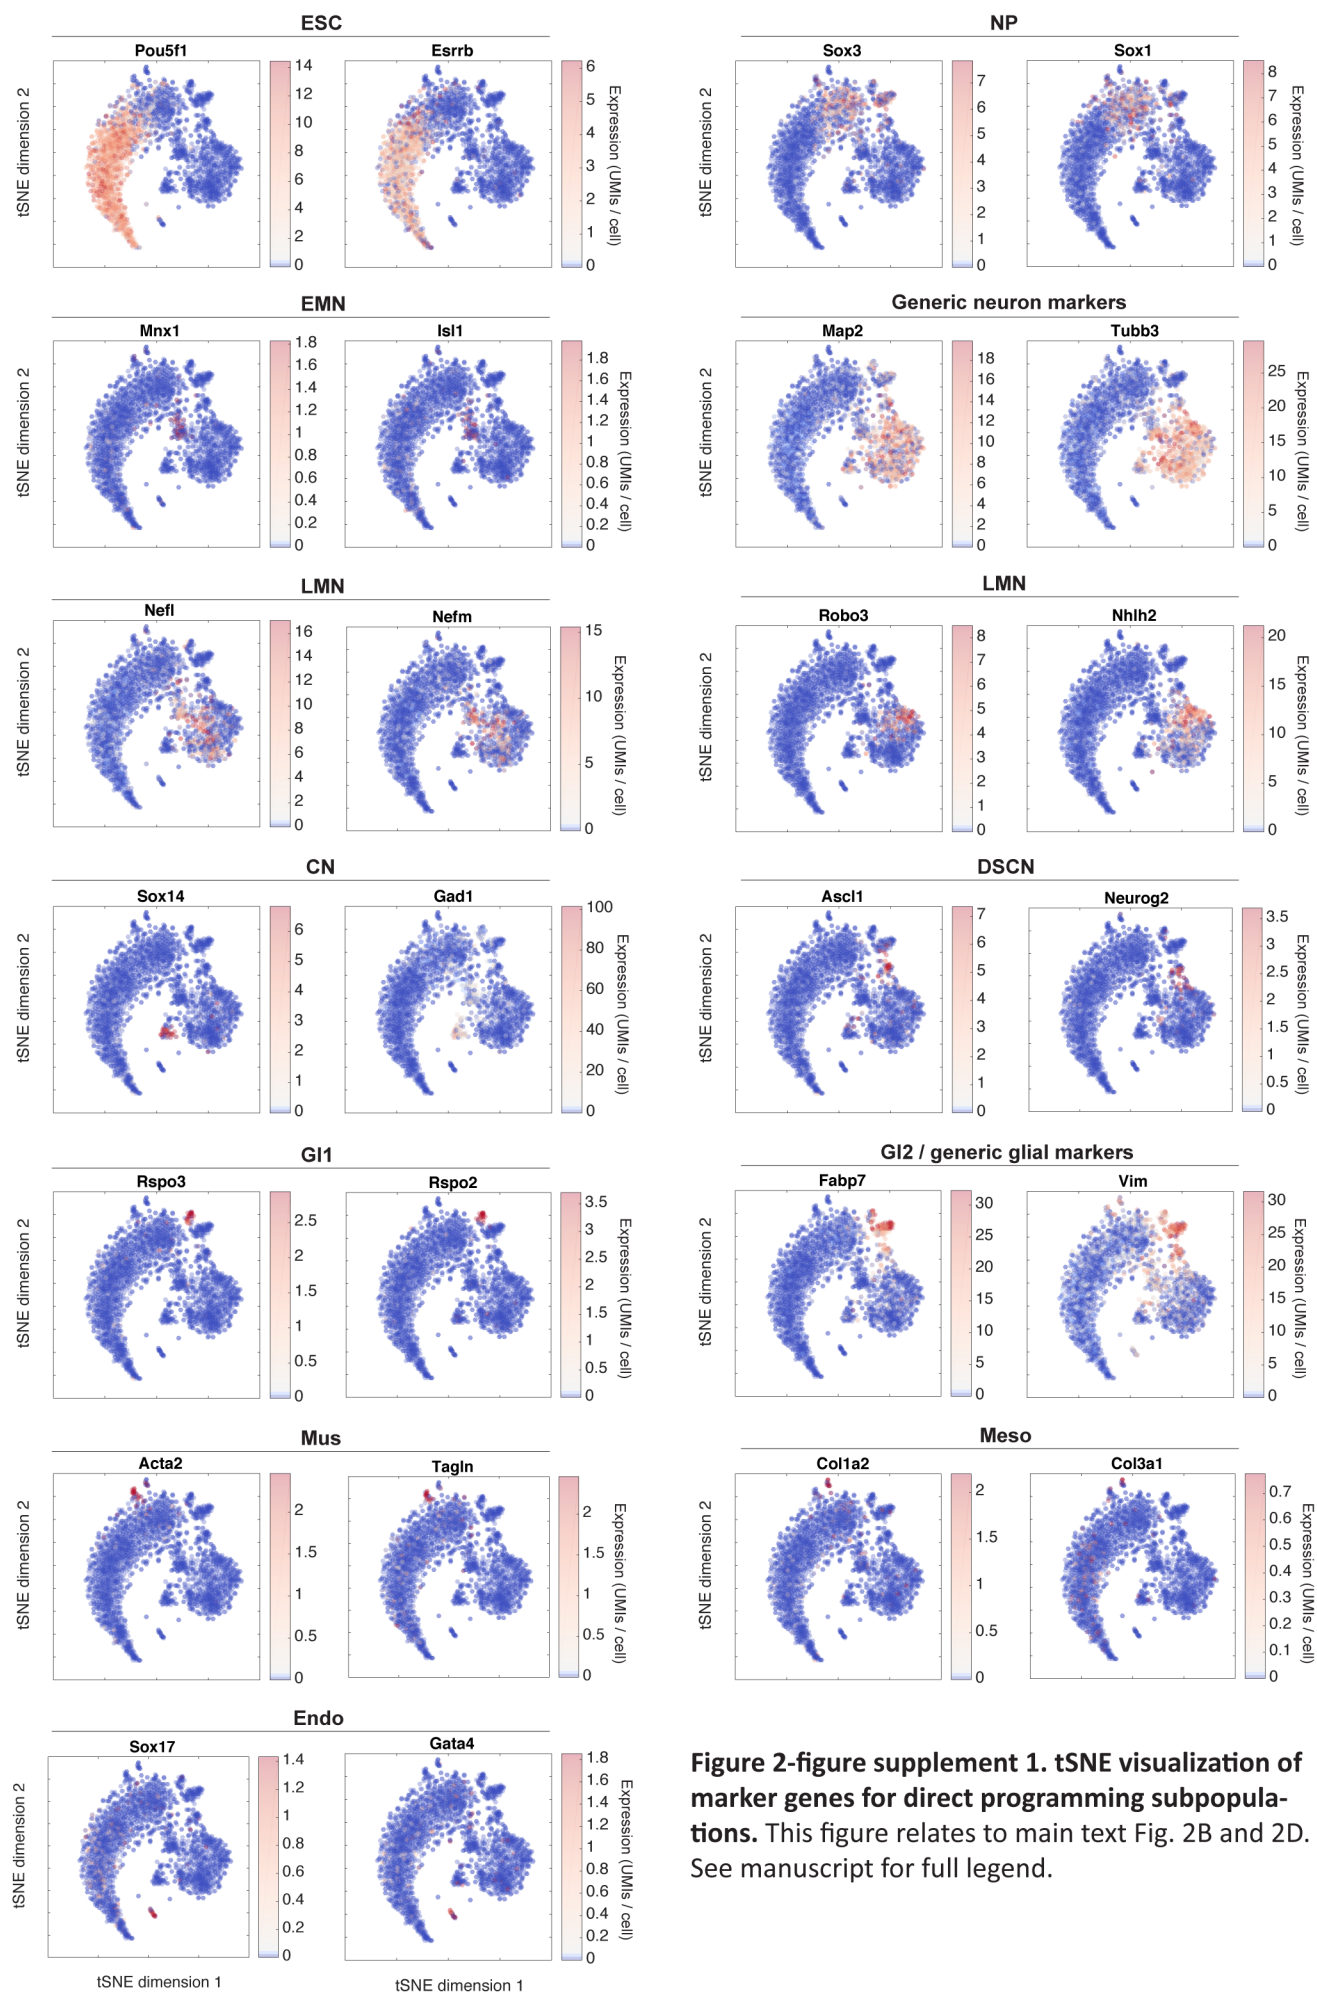

**Figure 2-figure supplement 1. tSNE visualization of marker genes for direct programming subpopulations.** This figure relates to main text Fig. 2B and 2D. See manuscript for full legend.
