# Supplementary material for: Mouse embryonic stem cells can differentiate via multiple paths to the same state
Source: eLife journal article supplement (doi:10.7554/elife.26945), 2017-10-09
Supplement: supp [file elife-26945-supp-v1.zip]

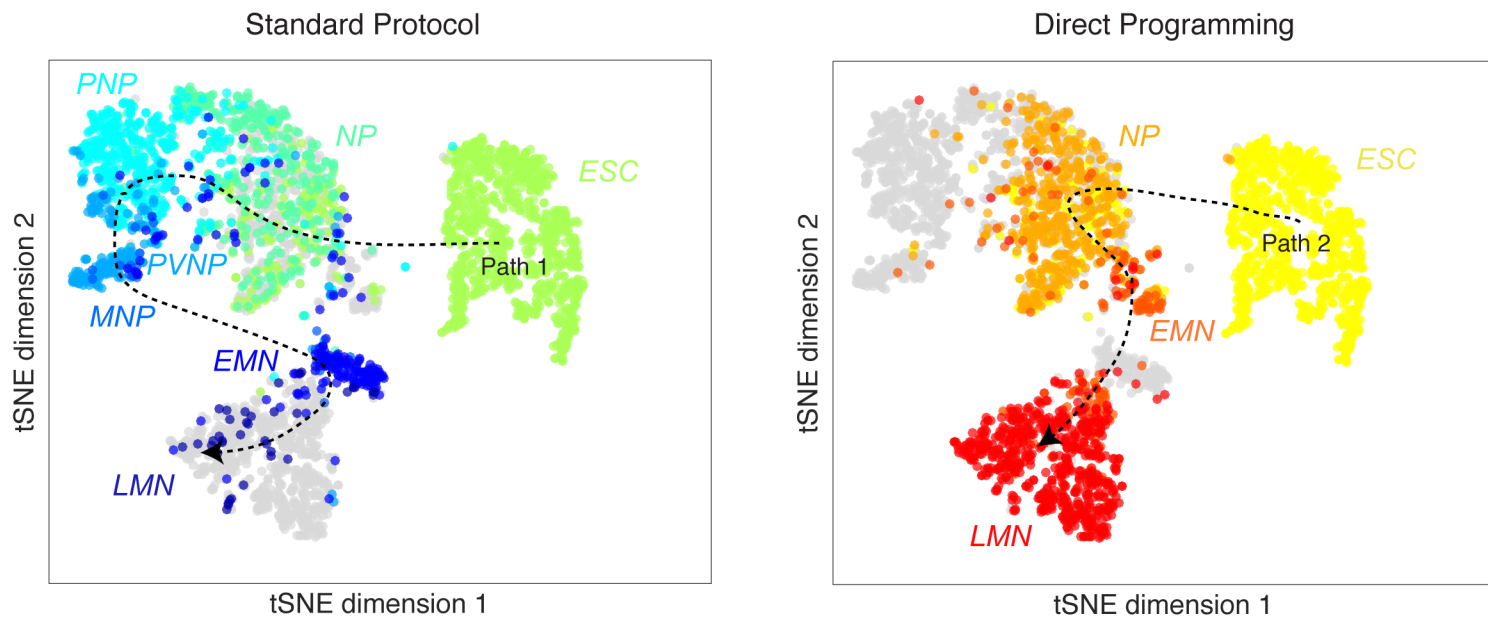

**Figure 3-figure supplement 2. Joint visualization of DP and SP differentiation paths by tSNE.** Like SPRING, tSNE shows similarity between early and late states, but it is ambiguous with respect to the continuous global topology of either path. Between DP and SP, tSNE confirms that ESC, NP, and LMN states between DP and SP are similar. Moreover, SP intermediate states (PNP, PVNP, and MNP) do not overlap with the DP intermediate state (EMN). However, since tSNE emphasizes local similarity relationships the overall joint topology, as revealed by SPRING in Figure 3A, is in this case ambiguous.
