# Supplementary material for: Mouse embryonic stem cells can differentiate via multiple paths to the same state
Source: eLife journal article supplement (doi:10.7554/elife.26945), 2017-10-09
Supplement: supp [file elife-26945-supp-v1.zip]

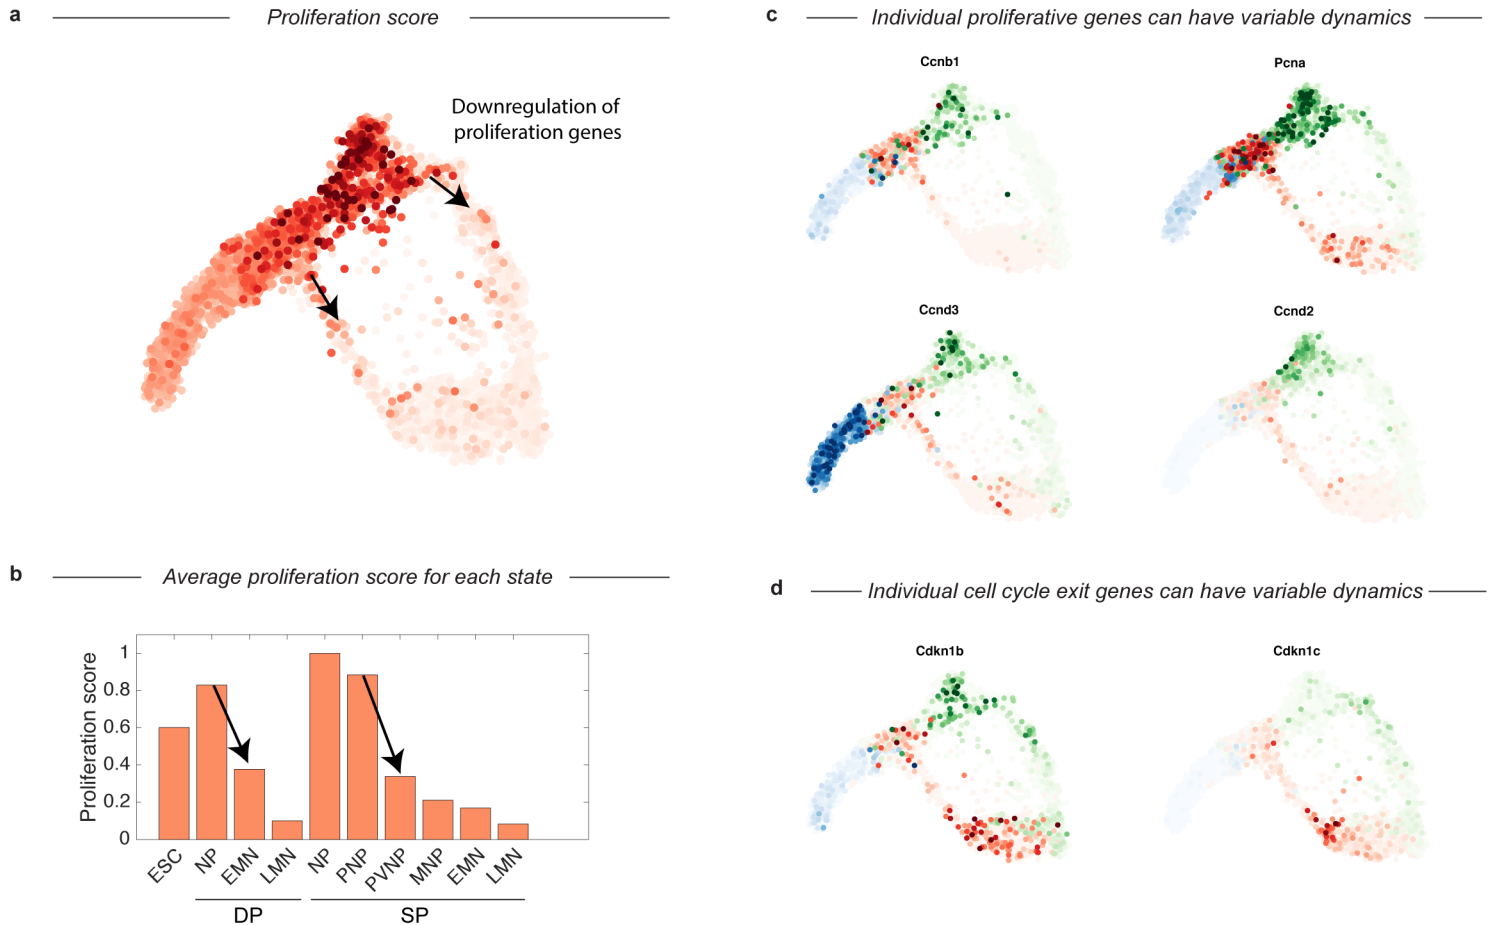

**Figure 4-figure supplement 1. Cell-cycle-associated gene expression decreases as cells enter the DP and SP intermediate states and then progressively mature.** This figure relates to main text Figure 4B. a) Cell cycle gene expression score overlaid on SPRING trajectory shown in main text. The score is the summed expression of a panel of 21 cell-cycle related genes. Cell cycle expression is high in ES cells and neural progenitors from both protocols, but drops sharply upon entry into the transitional states preceding terminal differentiation. b) Shows the average proliferation score along both DP and SP trajectories computed by state (and max normalized). Arrows indicate the same transition as the arrows shown above in panel a. c-d) Example raw expression data for representative individual cell cycle or tumor suppressor / cell-cycle exit genes. Some genes appear to be enriched in specific states, such as Ccnd3 in ES cells and Ccnd2 in neural progenitors from the SP. Expression in cells from each sample are colored using either a blue (ESC), red (DP), or green (SP) colormap.
